# Supplementary material
Source: publisher figshare collection journal article supplement (https://asha.figshare.com/articles/dataset/_/28577747)
Supplement: Supplementary file 1 [file 1]

## Supplemental Material S8. Model building outputs for generalized linear mixed effect models.

### Model 1

| AIC   | BIC   | deviance | df. residual |
|-------|-------|----------|--------------|
| 511.9 | 532.5 | 497.9    | 133          |

#### Random Effects

| (Intercept)               | Variance  | Standard deviation |
|---------------------------|-----------|--------------------|
| Number of different words | 0.1224    | 0.3499             |
| Mean length of utterance  | 0.000     | 0.000              |
| Child age                 | 0.000     | 0.000              |
| MSEL visual reception     | 1.368e-10 | 0.0000117          |

#### Fixed Effects

|                             | Estimate | Standard error | z value | p value |
|-----------------------------|----------|----------------|---------|---------|
| (Intercept)                 | -0.2664  | 0.1482         | -1.797  | 0.07    |
| Intransitive verb diversity | 0.1427   | 0.0172         | 8.314   | < .001  |
| Transitive verb diversity   | 0.0691   | 0.0157         | 4.413   | < .001  |

### Model 2

| AIC   | BIC   | deviance | df. residual |
|-------|-------|----------|--------------|
| 507.9 | 522.6 | 497.9    | 135          |

#### Random Effects

| (Intercept)               | Variance | Standard deviation |
|---------------------------|----------|--------------------|
| Number of different words | 0.1224   | 0.3499             |
| MSEL visual reception     | 0.0000   | 0.0000             |

#### Fixed Effects

|                             | Estimate | Standard error | z value | p value |
|-----------------------------|----------|----------------|---------|---------|
| (Intercept)                 | -0.2664  | 0.1482         | -1.797  | 0.07    |
| Intransitive verb diversity | 0.1427   | 0.0172         | 8.314   | < .001  |
| Transitive verb diversity   | 0.0691   | 0.0157         | 4.413   | < .001  |

### Model 3 (Final Model)

| AIC   | BIC   | deviance | df. residual |
|-------|-------|----------|--------------|
| 505.9 | 517.7 | 497.9    | 136          |

### Random Effects

| (Intercept)               | Variance | Standard deviation |
|---------------------------|----------|--------------------|
| Number of different words | 0.1224   | 0.3499             |

### Fixed Effects

|                             | Estimate | Standard error | z value | p value |
|-----------------------------|----------|----------------|---------|---------|
| (Intercept)                 | -0.2664  | 0.1482         | -1.797  | 0.07    |
| Intransitive verb diversity | 0.1427   | 0.0172         | 8.314   | < .001  |
| Transitive verb diversity   | 0.0691   | 0.0157         | 4.413   | < .001  |
