# Supplementary material
Source: publisher figshare collection journal article supplement (https://asha.figshare.com/articles/dataset/_/28577747)
Supplement: Supplementary file 2 [file 1]

**Supplemental Material S7.** Demographics for in study sample relative to out of study sample from W2W cohort.

| Variable                          | In<br>Study<br>Sample<br>( <i>n</i> =140) | Out of<br>Study<br>Sample<br>( <i>N</i> =167 ) | <i>p</i> -value |
|-----------------------------------|-------------------------------------------|------------------------------------------------|-----------------|
| Child Gender                      |                                           |                                                |                 |
| Female                            | 62                                        | 77                                             | 0.838           |
| Male                              | 78                                        | 90                                             |                 |
| Ethnicity                         |                                           |                                                |                 |
| Hispanic                          | 8                                         | 32                                             | <.001           |
| Not Hispanic                      | 132                                       | 134                                            |                 |
| Race                              |                                           |                                                |                 |
| Asian                             | 1                                         | 2                                              | <.001           |
| Black/African American            | 20                                        | 54                                             |                 |
| More than one race                | 13                                        | 15                                             |                 |
| White/Caucasian                   | 103                                       | 75                                             |                 |
| Not reported                      | 3                                         | 21                                             |                 |
| Maternal Education                |                                           |                                                |                 |
| Less than high school             | 0                                         | 1                                              | <.001           |
| High school or GED                | 3                                         | 13                                             |                 |
| Some college (no degree)          | 14                                        | 29                                             |                 |
| Associate's degree/Trade School   | 8                                         | 17                                             |                 |
| Bachelor's degree                 | 60                                        | 39                                             |                 |
| Graduate degree (MA, PhD, MD, JD) | 55                                        | 54                                             |                 |
| Not reported                      | 0                                         | 14                                             |                 |

*Note.* *p*-value < .05 indicates that the demographics of the sub-sample in the current study differs significantly from the sub-sample of participants excluded. The out of study sample reflects W2W participants who met the late talker determination inclusion/exclusion criteria.
